# Supplementary material for: Pyrroloquinoline quinone attenuates isoproterenol hydrochloride-induced cardiac hypertrophy in AC16 cells by inhibiting the NF-κB signaling pathway
Source: PubMed Central journal article supplement — Int J Mol Med. 2020 Jan 10;45(3):873–85. doi: 10.3892/ijmm.2020.4463 (PMC7015139; doi:10.3892/ijmm.2020.4463), 2020-01-10

Figure S1. The cell grouping in this study is illustrated in the flow chart. DMEM, Dulbecco's modified Eagle's medium; PSS, 100X penicillin-streptomycin solution; FBS, fetal bovine serum; DMEMNF, DMEM without FBS; PQQ, pyrroloquinoline quinone; Iso, isoproterenol hydrochloride.

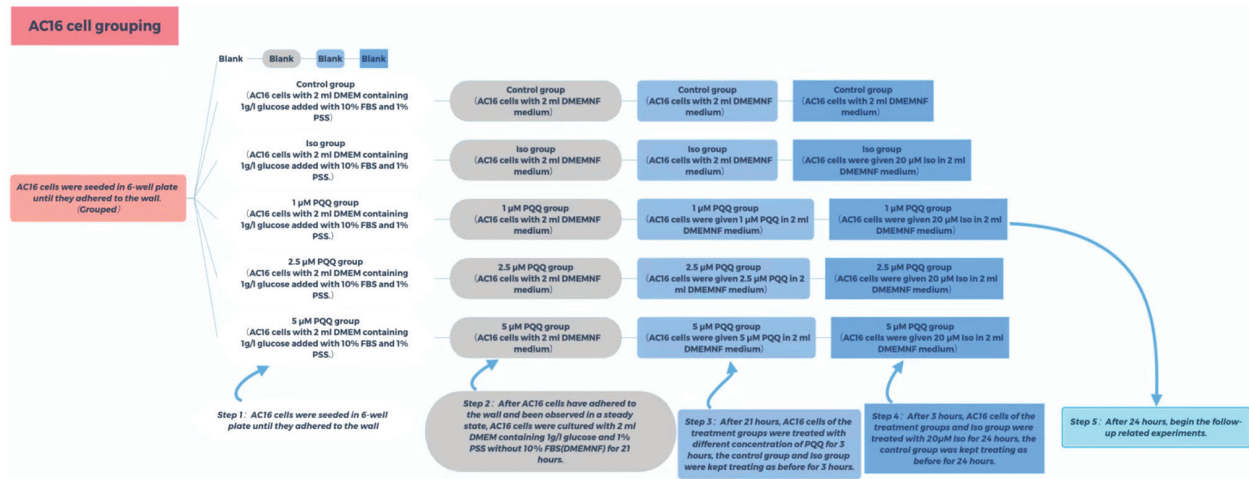

Supplement: Supplementary_Data.pdf [file Supplementary_Data.pdf]
